# Integrin-dependent phagocytosis – spreading from microadhesion to new concepts

Aurélien G. Dupuy and Emmanuelle Caron\*

Centre for Molecular Microbiology and Infection and Division of Cell and Molecular Biology, Imperial College London, Flowers Building, Armstrong Road, London, SW7 2AZ, UK

\*Author for correspondence (e-mail: e.caron@imperial.ac.uk)

Accepted 10 April 2008

Journal of Cell Science 121, 1773-1783 Published by The Company of Biologists 2008  
doi:10.1242/jcs.018036

## Summary

By linking actin dynamics to extracellular components, integrins are involved in a wide range of cellular processes that are associated with or require cytoskeletal remodelling and cell-shape changes. One such function is integrin-dependent phagocytosis, a process that several integrins are capable of mediating and that allows the binding and clearance of particles. Integrin-dependent phagocytosis is involved in a wide range of physiological processes, from the clearance of microorganisms and apoptotic-cell removal to extracellular-matrix remodelling. Integrin signalling is also exploited by microbial pathogens for

entry into host cells. Far from being a particular property of specific integrins and specialised cells, integrin-dependent uptake is emerging as a general, intrinsic ability of most integrins that is associated with their capacity to signal to the actin cytoskeleton. Integrin-mediated phagocytosis can therefore be used as a robust model in which to study integrin regulation and signalling.

Key words: Integrin, Adhesion, Phagocytosis, Microbial pathogens, Apoptotic cells

## Introduction

Integrins are heterodimeric receptors (comprising one  $\alpha$ - and one  $\beta$ -subunit) that are expressed at the surface of most metazoan cells (Fig. 1). To date, 18  $\alpha$ - and eight  $\beta$ -subunits have been described in human cells. They combine to form 24 different heterodimers that can bind a great variety of ligands (Hynes, 2002). Because of their diversity, integrins mediate a wide range of cellular functions, all of which are related to adhesion. For example, integrins are required for the adhesion and spreading of cells onto extracellular matrix (ECM) components such as fibronectin or collagen. Integrins can also mediate cell-cell adhesion, particularly during the formation of the immunological synapse and the transendothelial migration of leukocytes (Barreiro et al., 2007).

Two main mechanisms regulate integrin function (Fig. 1). First, the affinity of integrins for their ligands is greatly enhanced by an 'inside-out' signalling pathway that induces conformational changes in integrin extracellular domains such that they display a high affinity for their ligands (Luo et al., 2007). The binding of the N-terminal head domain of the cytoskeletal protein talin to an NPX[Y/F] motif in integrin- $\beta$  tails is necessary and sufficient for such inside-out integrin activation. The NPX[Y/F] motif is phylogenetically conserved and only absent in human  $\beta$ 4 and  $\beta$ 8 integrins and in the  $\beta$ 1B- and  $\beta$ 1C-integrin variants, none of which are regulated by inside-out signalling (Tadokoro et al., 2003). Second, ligand binding to activated integrins in turn triggers an 'outside-in' signalling pathway that recruits a huge network of proteins (Zaidel-Bar et al., 2007) and leads to the local reorganisation of the actin cytoskeleton. Regulators of outside-in signalling include signalling molecules [e.g. the FAK (focal adhesion kinase)-c-Src complex and Rho GTP-binding proteins] and adapters (e.g. Cas, Crk and paxillin) that assemble within dynamic adhesive structures (Geiger et al., 2001; Zamir and Geiger, 2001) (Fig. 1). The clustering of integrins constitutes a third regulatory mechanism, which is often referred to as the

controlling of integrin avidity (Carman and Springer, 2003). Because avidity changes are associated with increased ligand binding, it is not completely clear whether they are associated with inside-out or outside-in signalling. Finally, integrin trafficking and recycling is another mechanism that regulates cell adhesion and migration (Caswell and Norman, 2006).

Integrin signalling is mostly considered in the context of cell adhesion and migration. However, as reviewed here, many integrins can also mediate phagocytosis (Table 1). Phagocytosis is a process that allows a cell to successively bind, internalise and finally degrade particles over 0.5  $\mu$ m in diameter (Aderem and Underhill, 1999). In vertebrates, phagocytosis is fundamental both for the removal of pathogens as part of innate and adaptive immunity, and for the clearance of apoptotic cells (ACs) that are generated during development and cell turnover in tissues (Greenberg and Grinstein, 2002; Maderna and Godson, 2003). To capture and phagocytose targets, mammalian professional phagocytes [e.g. macrophages, neutrophils and dendritic cells (DCs)] have a range of phagocytosis-dedicated surface receptors, such as Fc $\gamma$  receptors [Fc $\gamma$ Rs; which bind the Fc region on immunoglobulin G (IgG)], scavenger receptors and also integrins (Aderem and Underhill, 1999; Underhill and Ozinsky, 2002). In contrast to macropinocytosis – an ingestion process that involves the formation of a large membrane extension away from the agonist-binding site (Conner and Schmid, 2003) – phagocytosis is a processive mechanism that is mediated by the successive ligation of receptors in a zipper-like process: during phagocyte uptake, receptors bind particles and signal a three-dimensional microadhesive process that wraps membrane in an actin-driven manner around the particle, leading to full engulfment (Griffin, Jr et al., 1975). Particle recognition and uptake can involve one of several types of receptor, particularly when very large or complex phagocytic targets are recognised, e.g. microorganisms or ACs (Underhill and Ozinsky, 2002). In these situations,

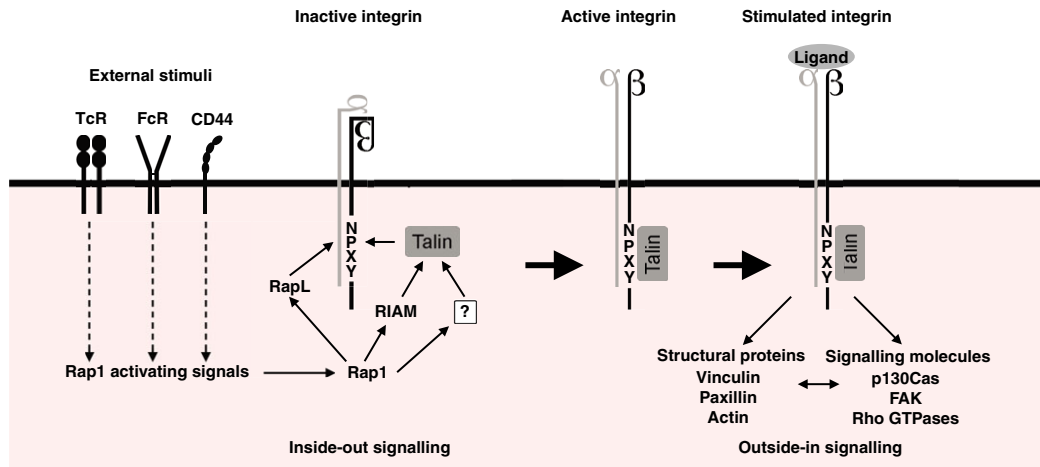

**Fig. 1.** Signalling pathways that control integrin function. The extracellular domains of inactive integrins are folded and display a conformation that has a low affinity for ligands. The inside-out signalling pathway activates integrins by inducing conformational changes that open the extracellular domains into a high-affinity ligand-binding state. Inside-out signalling is triggered intracellularly in response to external stimuli. Shown are surface receptors that are known to activate  $\beta_2$  integrins. The small GTPase Rap1 is a potent mediator of integrin inside-out signalling and activation. Rap1 is activated downstream of surface receptors. At least two downstream effectors of Rap1 have been shown to be involved in the activation of integrin function: RapL acts on the  $\alpha$ -subunit of the  $\alpha_L\beta_2$  integrin and RIAM is proposed to stimulate the binding of talin to the membrane-proximal NPX[Y/F] motif of the  $\beta$ -subunits. The binding of talin to the cytoplasmic tail of  $\beta$ -subunits is sufficient for integrin activation and characterises the active state of integrins. The binding of ligand to the extracellular domains of activated integrins stimulates outside-in signalling pathways, i.e. the activation and/or recruitment of multiple structural (e.g. vinculin, paxillin and actin) and signalling (e.g. p130Cas, FAK and Rho GTPases) proteins, leading to the remodelling of the actin cytoskeleton and the formation of adhesion structures.

distinct receptors can be devoted to particle recognition ('tethering' receptors) and stimulation of particle uptake ('tickling' receptors) (Zullig and Hengartner, 2004). Interestingly, zipper-like phagocytosis can also take place in non-professional phagocytes, either naturally or following transfection of phagocytic receptors (Caron and Hall, 1998; Underhill and Ozinsky, 2002).

Similar to cell adhesion and migration, phagocytosis crucially depends on remodelling of the actin cytoskeleton and on membrane dynamics (DeMali and Burridge, 2003; Niedergang and Chavrier, 2004). Moreover, the signalling pathways that underlie these processes have several regulatory proteins in common, including Rho-family proteins (Niedergang and Chavrier, 2005; Ridley et al., 2003). Interestingly, distinct Rho GTPases regulate actin polymerisation during phagocytosis and actually define several modes of phagocytosis that are phenotypically different. Indeed, during Fc $\gamma$ R-dependent (also referred as type I) uptake, activation of Rac1 and Cdc42 is thought to drive the formation of local pseudopods and membrane ruffles that engulf the particles. By contrast, actin polymerisation during integrin- $\alpha_M\beta_2$ -dependent (referred as type II) phagocytosis is regulated by RhoA activity, and particles that are bound to  $\alpha_M\beta_2$  sink into cells without generating major protrusions (see below and Fig. 2) (Allen and Aderem, 1996; Caron and Hall, 1998).

On the basis of the criteria defined above for phagocytosis (particle size, zipper-like receptor tickling, and actin-dependent and Rho-GTPase-dependent uptake), we review here the role of integrins in phagocytosis, both in professional phagocytes and also in cells that are not classically considered phagocytic. We highlight the similarities between the signalling basis of integrin function during adhesion and phagocytic uptake. Not only is phagocytosis the predominant function of certain integrins, it should be seen as an intrinsic ability of most integrins. By extension, integrin-mediated phagocytosis can be proposed as a good model to better understand the regulation of integrin function.

### Phagocytic integrins and immunity – integrin $\alpha_M\beta_2$ as a paradigm

Because phagocytosis allows rapid ingestion of microscopic and submicroscopic particles, it has been evolutionarily selected as an important mechanism in maintaining homeostasis and fighting pathogens (Underhill and Ozinsky, 2002). Although several integrins have now been identified as mediators of phagocytosis (Table 1), integrin  $\alpha_M\beta_2$  was the first phagocytic integrin to be characterised.  $\alpha_M\beta_2$ , a bona fide phagocytic receptor, also known as complement receptor 3 (CR3), CD11b/CD18 or Mac-1, has an essential role in the uptake of complement-opsonised microorganisms and ACs (Aderem and Underhill, 1999; Underhill and Ozinsky, 2002) (Fig. 1). The central role of  $\beta_2$  integrins in anti-microbial defence is illustrated by the fact that patients with leukocyte adhesion deficiency type I (LADI) syndrome, who lack a functional  $\beta_2$  integrin, are particularly prone to bacterial infections (Bunting et al., 2002; Hogg et al., 2002).

#### The small GTPase Rap1 controls inside-out signalling to the $\alpha_M\beta_2$ integrin

Most phagocytic receptors that are expressed by professional phagocytes (e.g. Fc $\gamma$ R) can constitutively perform phagocytosis. By contrast, phagocytosis that occurs through the  $\alpha_M\beta_2$  integrin requires extracellular stimulatory signals such as chemokines, cytokines (e.g. tumour necrosis factor- $\alpha$ ) and bacterial products (e.g. lipopolysaccharide) (Aderem and Underhill, 1999). The phagocytic potential of  $\alpha_M\beta_2$  can also be experimentally induced by phorbol esters (Wright and Meyer, 1986). The discovery that Rap1, a Ras-family small GTP-binding protein, is activated by these stimuli, and that accumulation of GTP-bound Rap1 is necessary and sufficient to activate  $\alpha_M\beta_2$  binding and phagocytic properties in macrophages, has provided a molecular basis for these observations. Furthermore, the demonstration of a link between Rap1 activity and  $\alpha_M\beta_2$ -integrin function during phagocytosis has advanced the

**Table 1. Integrin chains that mediate phagocytosis**

| Integrin                                                 | Ligand                       | Cell type         | Function                       | References                                     |
|----------------------------------------------------------|------------------------------|-------------------|--------------------------------|------------------------------------------------|
| <b>Physiological phagocytosis in mammals</b>             |                              |                   |                                |                                                |
| $\alpha$ M $\beta$ 2                                     | C3bi, fibrinogen             | Phagocytes        | Innate immunity                | (Beller et al., 1982)                          |
| $\alpha$ V $\beta$ 3, $\alpha$ V $\beta$ 5               | MFG-E8                       | Phagocytes        | Clearance of apoptotic cells   | (Hanayama et al., 2002; Savill et al., 1990)   |
| $\alpha$ V $\beta$ 5                                     | MFG-E8                       | RPE               | Circadian rhythm of RPE        | (Finnemann et al., 1997; Nandrot et al., 2007) |
| $\alpha$ 2 $\beta$ 1                                     | Collagen                     | Fibroblasts       | ECM remodelling                | (Arora et al., 2000; Lee et al., 1996)         |
| $\alpha$ 6 $\beta$ 1*                                    | fA $\beta$ peptide           | Phagocytes        | Removal of fA $\beta$ deposits | (Koenigsknecht and Landreth, 2004)             |
| <b>Pathological phagocytosis-like process in mammals</b> |                              |                   |                                |                                                |
| $\beta$ 1                                                | <i>Yersinia</i> spp. invasin | Epithelial cells  | <i>Yersinia</i> spp. entry     | (Tran Van Nhieu and Isberg, 1993)              |
| $\alpha$ 5 $\beta$ 1                                     | Fibronectin                  | Many <sup>†</sup> | <i>S. aureus</i> entry         | (Fowler et al., 2000; Sinha et al., 1999)      |
| $\alpha$ 5 $\beta$ 1, $\alpha$ V $\beta$ 3?              | Glycoproteins                | Many <sup>†</sup> | Herpes virus entry             | (Akula et al., 2002; Garrigues et al., 2008)   |
| $\alpha$ V $\beta$ 3, $\alpha$ V $\beta$ 5               | Capside protein              | Epithelial cells  | Adenovirus entry               | (Li et al., 1998; Wickham et al., 1993)        |
| <b>Physiological phagocytosis in insects</b>             |                              |                   |                                |                                                |
| <i>A. gambia</i>                                         |                              |                   |                                |                                                |
| BIMP2                                                    | Unknown                      | Haemocyte         | Immunity                       | (Moita et al., 2006; Moita et al., 2005)       |
| <i>D. melanogaster</i>                                   |                              |                   |                                |                                                |
| h $\beta$ <sub>3</sub> -like                             | Unknown                      | Haemocyte         | Immunity                       | (Foukas et al., 1998)                          |

Several integrins have been involved in phagocytosis in metazoa. For each integrin, the ligand involved, the cell type that mediates uptake and the relevant biological function are indicated. The term phagocyte refers to cells that are classically associated with phagocytic uptake, i.e. neutrophils, macrophages, DCs and microglial cells in mammals. See text for details.

\*Necessary but not sufficient; <sup>†</sup>epithelial, endothelial, fibroblast.

understanding of integrin inside-out signalling in general (Caron et al., 2000). Other macrophage receptors have been shown to activate  $\alpha$ M $\beta$ 2-mediated phagocytosis through Rap1 activation (Vachon et al., 2007). Similarly, Rap1 activity controls the activation of many different integrins, such as  $\alpha$ 3 $\beta$ 1,  $\alpha$ 4 $\beta$ 1,  $\alpha$ 5 $\beta$ 1,  $\alpha$ IIB $\beta$ 3 and  $\alpha$ L $\beta$ 2 (Bertoni et al., 2002; de Bruyn et al., 2002; de Bruyn et al., 2003; Enserink et al., 2004; Katagiri et al., 2002; McLeod et al., 2004; Reedquist et al., 2000; Sebzda et al., 2002).

How active Rap1 signals to integrins in general, and in particular to  $\alpha$ M $\beta$ 2, remains unclear, although several downstream effectors of Rap1 have been proposed to mediate its pro-adhesive effects (Fig. 1). RapL (regulator for cell adhesion and polarisation enriched in lymphoid tissues) interacts with GTP-bound Rap1 and is necessary for the ability of Rap1 to polarise the distribution of active  $\alpha$ L $\beta$ 2 integrins in lymphoid cells (Katagiri et al., 2003). Because specific mutations in  $\alpha$ L abrogate both RapL co-immunoprecipitation with  $\alpha$ L and Rap1- and RapL-dependent  $\alpha$ L $\beta$ 2 polarisation, RapL was proposed to mediate Rap1 activity on the  $\alpha$ L subunit, as suggested in Fig. 1 (Katagiri et al., 2003). In agreement with the exclusive expression of  $\alpha$ L in leukocytes, RapL knock-out mice only show abnormalities in lymphoid organs, a result that also correlates with RapL expression in lymphoid tissues. However, no phagocytic or general adhesion defects were observed in these mice (Katagiri et al., 2004). Considering that Rap1 is a general activator of integrins that controls inside-out signalling in many cell types, it is reasonable to assume that RapL is not the universal Rap1 effector that regulates integrin activation. Additionally, as alluded to above, direct binding of the talin head domain to the cytoplasmic tail of many integrin- $\beta$  subunits has been described as a powerful way of activating integrins, including  $\beta$ 2 integrins (Lim et al., 2007; Tadokoro et al., 2003). Importantly, Rap1-induced regulation of the platelet integrin  $\alpha$ IIB $\beta$ 3 was recently shown to depend on another Rap1 effector, RIAM (Rap-interacting adhesion molecule), an adapter protein previously shown to stimulate  $\alpha$ L $\beta$ 2- and  $\alpha$ 4 $\beta$ 1-dependent adhesion of Jurkat cells (Han et al., 2006; Lafuente et al., 2004). RIAM colocalises and can be co-immunoprecipitated with talin, and RIAM silencing reduces Rap1-dependent activation of  $\alpha$ IIB $\beta$ 3 integrin (Han et al., 2006). It

has thus been proposed that RIAM links Rap1 to integrin activation by promoting the recruitment of talin (Fig. 1). However, silencing of RIAM in macrophages has no effect on  $\alpha$ M $\beta$ 2-dependent binding and phagocytosis of complement (C3bi)-opsonised red blood cells, suggesting that RIAM is not involved in the inside-out activation of  $\alpha$ M $\beta$ 2. Moreover, unlike talin, RIAM overexpression in macrophages or  $\alpha$ M $\beta$ 2-transfected cells is not sufficient to increase particle binding (our unpublished data). Despite the universal role of Rap1 signalling in activating different integrin heterodimers, it is conceivable that different downstream effectors of Rap1 could mediate inside-out signalling to distinct integrins (Fig. 1). In any case, the mechanisms that link Rap1 to integrin activation and their dependency on talin still remain to be fully elucidated for  $\alpha$ M $\beta$ 2 and other integrins.

#### RhoA mediates outside-in signalling downstream of $\alpha$ M $\beta$ 2

A significant advance in the understanding of phagocytosis was the discovery that, contrary to Fc $\gamma$ R (the main receptor for IgG-opsonised particles) and most other phagocytic receptors, the  $\alpha$ M $\beta$ 2 integrin requires RhoA, but not Rac1 or Cdc42, activity to drive actin polymerisation and particle uptake (Caron and Hall, 1998) (Fig. 2). Early electron-microscopy studies showed that  $\alpha$ M $\beta$ 2-mediated phagocytosis is not associated with the formation of membrane protrusions (Allen and Aderem, 1996), an event that correlates with activation of Rac1 and Cdc42. By contrast, following  $\alpha$ M $\beta$ 2 ligation, RhoA is specifically activated and recruited to the site of phagocytosis (Wiedemann et al., 2006). Accordingly, inhibition of RhoA (but not of Rac1 or Cdc42) using either dominant-negative mutants or C3 transferase (a specific Rho inhibitor) inhibits  $\alpha$ M $\beta$ 2-dependent phagocytosis both in macrophage cell lines and in  $\alpha$ M $\beta$ 2-transfected fibroblasts (Caron and Hall, 1998; Colucci-Guyon et al., 2005; Wiedemann et al., 2006). The implication of the presence of RhoA in the pathway that links  $\alpha$ M $\beta$ 2 to actin dynamics is also highlighted by the fact that phagocytosis requires two specific RhoA effectors – the serine/threonine kinase Rock and the formin-related elongating factor mDia (known as DIAPH in humans) – in both cell models (Colucci-Guyon et al., 2005; Olazabal et al., 2002). Rock activity

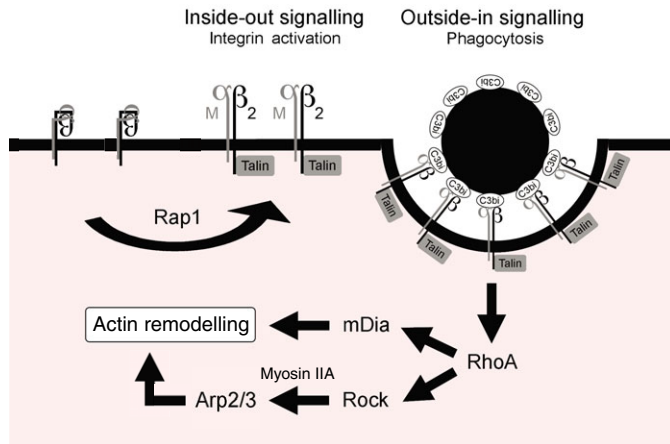

**Fig. 2.**  $\alpha$ M $\beta$ 2-dependent phagocytosis is mediated by RhoA.  $\alpha$ M $\beta$ 2 integrin binds ligands poorly in resting phagocytes. External stimuli induce an inside-out signalling pathway that activates the small GTP-binding protein Rap1, which results in the induction of structural changes in  $\alpha$ M $\beta$ 2 and increased affinity for its ligand, the C3bi complement fragment that coats phagocytic preys. The capture of a C3bi-opsonised particle by  $\alpha$ M $\beta$ 2 integrins generates forces that pull the particle inside the cell along a Rho-dependent actin-polymerisation pathway that involves Rock and mDia (outside-in signalling). See text for details.

mediates the local recruitment of the actin-branching protein Arp2/3 and the activation of myosin IIA underneath bound particles (May et al., 2000; Olazabal et al., 2002). mDia is required for actin polymerisation and cooperates with the Rock-Arp2/3 pathway to pull the particles inside cells (Colucci-Guyon et al., 2005) (Fig. 2). Finally, mutations in two distinct regions of the  $\beta$ 2-integrin cytoplasmic tail abrogate RhoA recruitment and activation as well as actin polymerisation and phagocytosis, showing the importance of the  $\beta$ 2 subunit in the signalling pathway of uptake (Wiedemann et al., 2006).

Multiple lines of evidence therefore support the model of a Rho-dependent, Rac1-independent mechanism for  $\alpha$ M $\beta$ 2-mediated phagocytosis. However, a recent article has challenged this view by proposing that both Rho and Rac activities are required for efficient uptake through  $\alpha$ M $\beta$ 2 (Hall et al., 2006). Bone-marrow-derived macrophages that originate from either *vav1<sup>-</sup>vav3<sup>-</sup>* or *rac1<sup>-</sup>rac2<sup>-</sup>* double-knockout mice are impaired in their ability to phagocytose  $\alpha$ M $\beta$ 2 ligands. Because Vav1 and Vav3 are two closely related members of the Vav family of guanine nucleotide-exchange factors for Rho-family proteins (RhoGEFs), and therefore activate Rho-family proteins, these data suggest that Vav1 and Vav2 regulate Rac activity downstream of  $\alpha$ M $\beta$ 2 ligation. This discrepancy could easily be explained by the existence of different pathways that regulate  $\alpha$ M $\beta$ 2-dependent uptake in primary and immortalised cells. However, it is worth noticing that, in all macrophage types that have been examined so far,  $\alpha$ M $\beta$ 2-mediated uptake can clearly occur independently of tyrosine-kinase signalling (Allen and Aderem, 1996; Lutz and Correll, 2003). Because Vav activity is mainly regulated by the tyrosine-kinase-dependent release of an inhibitory intramolecular interaction in all cell systems hitherto used (Aghazadeh et al., 2000), a Vav-Rac pathway that is downstream of  $\alpha$ M $\beta$ 2 implies the existence of a novel, tyrosine-phosphorylation-independent mechanism of Vav activation. Alternatively, in primary macrophages, Vav and Rac could signal downstream of a receptor that cooperates with  $\alpha$ M $\beta$ 2 in particle uptake or be involved in the activation of  $\alpha$ M $\beta$ 2 by inside-out signalling.

Importantly, integrin-mediated phagocytosis also contributes to the immune response in insects. Although invertebrates lack  $\alpha$ M $\beta$ 2, phagocytosis of *Escherichia coli* by *Drosophila melanogaster* haemocytes is reduced in the presence of RGD (Asp-Gly-Arg)-containing peptides, which are well-known competitors for integrin ligands, or after pre-incubation with anti-human  $\beta$ 3-integrin antibodies. These data clearly indicate a role for a  $\beta$ 3-like integrin in anti-microbial immunity in the fly (Foukas et al., 1998). The specific *Drosophila* integrin that is involved in bacterial uptake is still unknown. It is, however, likely to be the orthologue of a phagocytic integrin that has been recently identified in other insects. Indeed, genetic screening in the mosquito *Anopheles gambiae* has isolated a  $\beta$  integrin (BINT2), the knockout of which reduces phagocytosis of *E. coli* by 70% (Moita et al., 2006; Moita et al., 2005). The fact that integrins are used both in mammals and insects to remove pathogens suggests that these receptors have been selected early in evolution as mediators of phagocytosis. It is therefore possible that, in mammals, certain integrins have become specialised to allow efficient phagocytosis.  $\alpha$ M $\beta$ 2 is clearly the paradigmatic phagocytic integrin. In this Commentary, however, we will see that phagocytic ability is in fact common to many mammalian integrins.

### Integrin-dependent phagocytosis and tissue remodelling

Phagocytosis is not restricted to the clearance of pathogens by professional phagocytes. It is also a mechanism that allows the removal of ACs and components of the ECM, such as the collagen fibrils that are generated during tissue remodelling (Lee et al., 1996; Ravichandran and Lorenz, 2007; ten Cate, 1972). Interestingly, several integrins are involved in these two processes.

#### $\alpha$ V $\beta$ 3, $\alpha$ V $\beta$ 5 and apoptotic-cell phagocytosis

ACs that arise during development, normal tissue turnover, inflammation and repair are quickly cleared to avoid secondary necrosis and the release of toxic materials into the environment. Moreover, AC phagocytosis is generally associated with the inhibition of inflammation (Henson, 2005). The integrins that are involved in AC phagocytosis are  $\alpha$ V $\beta$ 3 and  $\alpha$ V $\beta$ 5, which are best known for their potential roles in angiogenesis and tumour-cell metastasis (Reynolds et al., 2002; Taverna et al., 2004). Pre-treatment with RGD peptides or with  $\alpha$ V $\beta$ 3-blocking antibodies severely inhibits the ability of human macrophages to phagocytose apoptotic neutrophils (Savill et al., 1990). By contrast, DCs – phagocytes that also express  $\alpha$ V $\beta$ 3 – use  $\alpha$ V $\beta$ 5 integrin to internalise ACs (Akakura et al., 2004; Albert et al., 1998). Nonetheless, in all cases, integrin-dependent AC uptake is indirect and is mediated by MFG-E8 (milk fat globule-EGF factor 8), a protein that is secreted by macrophages and DCs. MFG-E8 binds phosphatidylserine, an ‘eat-me’ signal that is exposed on the cell surface shortly after induction of the apoptotic programme (Akakura et al., 2004; Hanayama et al., 2002). The crucial role of MFG-E8 in mediating the recognition of ACs by phagocytes is illustrated by the fact that AC uptake is strongly impaired in MFG-E8-knockout mice (Hanayama et al., 2004). Interestingly,  $\alpha$ V $\beta$ 5-mediated MFG-E8-dependent phagocytosis is not restricted to professional phagocytes: HEK293 epithelial cells can also phagocytose ACs in an  $\alpha$ V $\beta$ 5-dependent manner (Albert et al., 2000), as can retinal pigment epithelial cells during circadian-synchronised phagocytosis of photoreceptors, a daily process that is crucial for vision (Finnemann et al., 1997; Nandrot et al., 2007; Nandrot et al., 2004).



The signalling pathways that mediate AC uptake have been partially characterised. Interestingly, they differ from those that are mediated by the  $\alpha\text{M}\beta\text{2}$  integrin (compare Fig. 2 and Fig. 3). Whereas  $\alpha\text{M}\beta\text{2}$ -dependent phagocytosis is mediated by RhoA activity, integrin-dependent AC uptake is dependent on Rac1. Indeed, a dominant-negative mutant of Rac1 inhibits AC phagocytosis; in parallel, the levels of active Rac1 increase during AC challenge of macrophages and DCs (Kerksiek et al., 2005; Leverrier and Ridley, 2001; Nakaya et al., 2006). By contrast, a dominant-negative mutant of RhoA enhances AC phagocytosis in macrophages (Leverrier and Ridley, 2001; Tosello-Tramont et al., 2003). The implication of Rac1 in AC uptake is also suggested by the fact that, similar to the Rac1-dependent Fc $\gamma$ R-mediated phagocytosis of IgG-coated beads, AC engulfment requires membrane ruffling (Hoffmann et al., 2001; Ogden et al., 2001).

Significantly, the role of Rac1 during AC uptake is phylogenetically conserved and was initially unveiled in *Caenorhabditis elegans*. In this genetically tractable model system, a series of mutants deficient in the engulfment of dying cells and cell corpses (*ced* mutants) was identified. CED proteins fall into two partially redundant pathways (CED-1–CED-6–CED-7 and CED-2–CED-5–CED-12), which converge into CED-10, the *C. elegans* orthologue of mammalian Rac1. In the worm, local activation of CED-10 is ensured by CED-5 and CED-12, orthologues of mammalian Dock180 and Elmo, respectively. CED-5 and CED-12 are themselves thought to be recruited to the vicinity of bound ACs by CED-2, the CrkII orthologue (Brugnera et al., 2002; Ellis et al., 1991; Gumienny et al., 2001; Hedgecock et al., 1983; Kinchen et al., 2005; Lu et al., 2004; Reddien and Horvitz, 2000; Wu et al., 2001; Zhou et al., 2001a).

Remarkably, the AC-uptake pathway that has been identified in *C. elegans* appears to be conserved in mammals. In the HEK293T epithelial cell line,  $\alpha\text{V}\beta\text{5}$ -dependent phagocytosis of ACs is inhibited by dominant-negative mutants of CrkII and Rac1, and ligation of  $\alpha\text{V}\beta\text{5}$  by vitronectin stimulates the formation of a complex between p130Cas, CrkII and Dock180 (Albert et al., 2000). However, recruitment of a CrkII–Dock180 complex and activation of Rac1 could be dependent on receptors that cooperate with integrins in the recognition and/or uptake of apoptotic bodies. Indeed, macrophages display multiple recognition receptors for ACs (reviewed by Ravichandran and Lorenz, 2007). One such receptor is Mer, a tyrosine-kinase receptor. Similar to integrins, Mer binds phosphatidylserine indirectly, through the serum protein GAS6 (Nagata et al., 1996). Macrophages from *Mer*-knockout mice are strongly inhibited in AC phagocytosis both in vitro and in vivo (Cohen et al., 2002; Scott et al., 2001). Interestingly, Mer stimulates the formation of a p130Cas–CrkII–Dock180 ternary complex in a  $\alpha\text{V}\beta\text{5}$ -dependent manner (Wu et al., 2005). Mammalian integrins therefore probably contribute to AC uptake together with co-receptors. The importance of CrkII in the AC-uptake pathway was recently challenged, because Dock180–Elmo can activate Rac1 independently of CrkII both in mammalian cells and in *C. elegans*, possibly via another Rho-family protein, RhoG (deBakker et al., 2004; Tosello-Tramont et al., 2007). Another possibility is that Dock180–Elmo is directly recruited to some receptors, such as BAI1 (brain-specific angiogenesis inhibitor 1), a seven-transmembrane protein that binds phosphatidylserine directly and mediates Rac1 activation by recruiting the Dock180–Elmo complex (Park et al., 2007).

Others phagocytic receptors, such as CD36 (Fadok et al., 1998; Greenberg et al., 2006; Lucas et al., 2006) and CD14 (Devitt et al.,

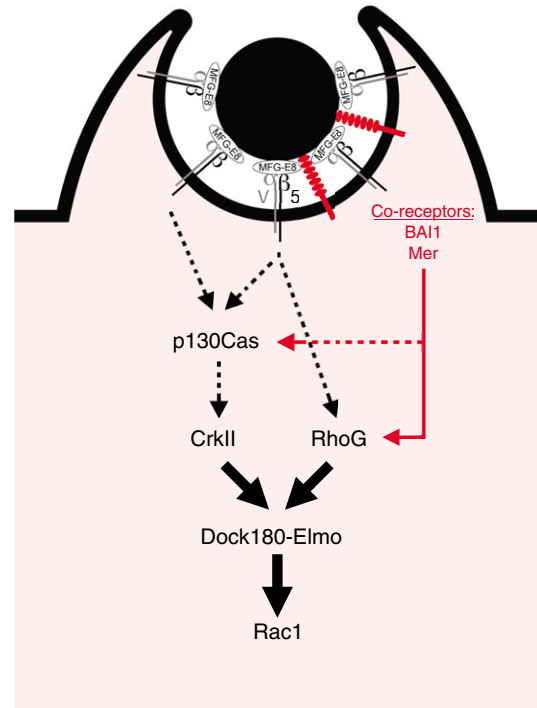

**Fig. 3.**  $\alpha\text{V}\beta\text{5}$ -dependent phagocytosis of apoptotic cells is mediated by Rac1. MFG-E8-opsonised ACs are captured by  $\alpha\text{V}\beta\text{5}$  integrins in DCs. The membrane protrusions that engulf the AC are triggered by the activation of Rac1 by the bimolecular Dock180–Elmo complex. A cascade that involves the adaptor proteins p130Cas and CrkII and a pathway that involves RhoG can lead to the recruitment and activation of Dock180–Elmo. Both pathways could be dependent on the engagement of co-receptors (such as BAI1 or Mer) by ACs.

1998), are engaged in the binding of ACs and contribute to AC phagocytosis both in vitro and in vivo. Whether they induce or modulate signalling downstream of  $\alpha\text{V}\beta\text{5}$  or  $\alpha\text{V}\beta\text{3}$  remains unknown. In particular, whether the activation of  $\alpha\text{V}\beta\text{3}$  and  $\alpha\text{V}\beta\text{5}$  by inside-out signalling is necessary for integrin-dependent phagocytosis of ACs and whether co-receptors control this pathway remain unclear. Surprisingly, it has recently been shown that, whereas the NPXY motif of  $\beta\text{5}$  integrin is required for the adhesion of cells on vitronectin, it is not necessary for  $\alpha\text{V}\beta\text{5}$ -dependent phagocytosis (Singh et al., 2007). Unlike  $\beta\text{1}$ – $\beta\text{3}$ ,  $\beta\text{5}$  does not harbour the conventional talin-head-domain binding site, which is characterised by a tryptophan residue that is located seven to eight amino acids before the NPXY motif. It is therefore possible that  $\alpha\text{V}\beta\text{5}$  is activated in a talin-independent manner. Alternatively, integrin-dependent AC phagocytosis could be regulated at the level of integrin availability at the plasma membrane, as recently shown for  $\alpha\text{V}\beta\text{5}$ -dependent phagocytosis of photoreceptor outer segments by retinal pigment epithelial (RPE) cells. In these cells, CD81, which belongs to the tetraspanin family (membrane proteins that regulate the activity of surface receptors, including integrins), stimulates  $\alpha\text{V}\beta\text{5}$ -dependent phagocytosis by increasing the level of  $\alpha\text{V}\beta\text{5}$  expression at the cell surface (Chang and Finnemann, 2007).

Therefore, the picture that emerges for AC phagocytosis is one of receptor cooperation. Such a multiple-recognition system could have been selected to ensure efficient uptake. Receptor cooperation also exists for AC uptake in *C. elegans*, although the real picture remains incomplete. Whether integrins also mediate AC recognition and phagocytosis in nematodes remains unclear. In *C. elegans*, the

integrin repertoire is limited to two, because two  $\alpha$ -subunits (encoded by the *ina-1* and *pat-2* genes) and one  $\beta$ -subunit (encoded by *pat-3*) are expressed (Cox and Hardin, 2004). Unsurprisingly, integrin mutants have numerous developmental defects, which may have masked a possible role in phagocytosis (Baum and Garriga, 1997; Lee et al., 2001; Williams and Waterston, 1994). The receptor(s) upstream of the CED-2–CED-5–CED-12 cascade is still missing and could be an integrin. By contrast, CED-1 is a transmembrane protein that controls AC uptake by acting upstream of CED-6 and CED-7; CED-1 clusters around AC corpses in a CED-6-dependent manner (Zhou et al., 2001b). Noticeably, the cytoplasmic tail of CED-1 displays an NPXY motif that is reminiscent of the one found in integrins. Whether this domain contributes to the function of CED-1 remains to be elucidated.

Obviously, the main challenge in this field will entail teasing out the receptors that are solely involved in AC recognition from those that also significantly contribute to internalisation.

#### Integrin-dependent uptake and degradation of extracellular-matrix components

Degradation of collagen by fibroblasts is a fundamental process in the growth and development of connective tissues, the maintenance of tissue homeostasis and during wound healing (Everts et al., 1996). Two pathways mediate collagen degradation: an extracellular pathway involves the secretion of metalloproteases that degrade collagen into fibrils (Birkedal-Hansen et al., 1993), whereas the so-called intracellular pathway in fact reflects a phagocytic event (Everts et al., 1996). The engulfment of collagen fibrils is mediated by  $\alpha 2\beta 1$  integrins (Knowles et al., 1991; Lee et al., 1996). This actin-driven uptake process is comparable to type I phagocytosis, with protrusive uptake and involvement of Rac1 (Arora et al., 2004; Arora et al., 2000; Melcher and Chan, 1981; Serrander et al., 2000). Surprisingly, whereas  $\alpha 2\beta 1$  is widely expressed, phagocytosis of collagen is a particular feature of fibroblasts. This could be due to the fibroblast-specific expression of co-receptors and/or signalling components that are essential for the phagocytic response. Overexpression or misregulation of these molecules could participate in the invasion of tissues through the ECM by tumour cells (Gaggioli et al., 2007).

So far, no other ECM protein (e.g. fibrinogen or fibronectin) has received attention in this context. Nevertheless, because beads that are coated with fibronectin are efficiently internalised by fibroblasts and RPE cells (Tsai et al., 1999; Zhao et al., 1999), and because some pathogens use fibronectin to trigger their uptake (see below), the phagocytic-like removal of other large ECM aggregates is conceivable. Overall, these findings suggest that whether integrins mediate adhesion or phagocytosis depends on the size of the ECM surface that is presented and on the ability of the cell to wrap around the ECM-coated material. Interestingly, the  $\beta$ -amyloid plaques that are formed by the aggregation of  $\beta$ -amyloid peptides in the brain of patients who have Alzheimer disease are extracellular nanostructures that could be internalised by phagocytosis. Indeed, microglial cells – bona fide phagocytes of the central nervous system – can phagocytose microaggregates of  $\beta$ -amyloid peptide in vitro (Paresce et al., 1996). Moreover, microglial cells are recruited to  $\beta$ -amyloid plaques in patients who have Alzheimer disease, which suggests that a lack of recognition and/or phagocytosis of  $\beta$ -amyloid aggregates might contribute to disease. Interestingly, the recognition of fibrillar  $\beta$ -amyloid peptides involves a complex between the integrin  $\alpha 6\beta 1$ , the integrin-associated protein CD47 and the scavenger receptor CD36

(Bamberger et al., 2003). Phagocytosis of fibrillar  $\beta$ -amyloid peptides involves Vav and Rac1 activities (Koenigsknecht and Landreth, 2004; Wilkinson et al., 2006).

#### Integrins that turn phagocytic in pathogenic conditions

Integrins are often targeted by bacterial and viral pathogens, which use them to establish intimate contact with, and often gain entry into, host cells (Hauck et al., 2006; Nemerow and Cheresch, 2002; Stewart and Nemerow, 2007).

#### $\beta 1$ integrins and bacterial invasion

Enteropathogenic *Yersinia* species present the best-known case of the hijacking of integrin function for bacterial invasion. These Gram-negative bacteria express an adhesin (a surface protein that mediates their interaction with host cells) called invasin, the binding of which to  $\alpha 5\beta 1$  integrins is sufficient to trigger bacterial entry into epithelial host cells (Tran Van Nhieu and Isberg, 1993; Wong and Isberg, 2005). As shown by the use of invasin-coated beads to challenge cells that express either the  $\beta 1A$  or  $\beta 1B$  splice variant of the  $\beta 1$  subunit, the ability of invasin to induce phagocytosis relies on signalling from the  $\beta 1$  subunit.  $\beta 1A$  (the common  $\beta 1$  subunit) and its  $\beta 1B$  variant only differ in the C-terminal region of their cytoplasmic tail. In particular, the  $\beta 1B$  variant does not display the NPXY motif that is necessary for binding to talin (Czuchra et al., 2006). Whereas invasin-coated beads bind similarly to  $\beta 1A$ - and  $\beta 1B$ -containing integrins, only  $\beta 1A$  supports phagocytosis (Gustavsson et al., 2002). Thus, as seen for  $\beta 2$  during  $\alpha M\beta 2$ -dependent phagocytosis (Wiedemann et al., 2006), the cytoplasmic tail of the  $\beta 1$  subunit is essential for invasin-induced uptake. Consistent with previous studies showing that  $\beta 1$  integrins signal to Rac1 during cell spreading (Hirsch et al., 2002; Pankov et al., 2005; Stewart and Nemerow, 2007; Suzuki-Inoue et al., 2001), invasin-triggered phagocytosis requires Rac1 activity (Alrutz et al., 2001; McGee et al., 2001). The similarities between the classical and phagocytic behaviours of  $\beta 1$  integrins is further illustrated by the fact that, when  $\beta 1A$ -expressing cells spread onto an invasin-coated surface,  $\beta 1A$  integrins colocalise with vinculin, paxillin and FAK into structures that are essentially identical to the focal adhesions that form when cells spread onto fibronectin; comparatively,  $\beta 1B$ -expressing cells spread poorly (Gustavsson et al., 2002; Gustavsson et al., 2004). Thus, invasin-mediated phagocytosis corresponds to the embezzlement of the  $\beta 1$  signalling pathways that are classically used for cell adhesion and spreading.

This notion is further validated by the example of pathogens that hijack the physiological ligands of  $\beta 1$  to enter host cells. Another *Yersinia* spp. adhesin, YadA, also targets the  $\beta 1$  integrin to promote bacterial entry. Unlike invasin, which binds to  $\beta 1$  directly, YadA-induced  $\alpha 5\beta 1$ -dependent uptake requires the formation of a fibronectin bridge between YadA and the integrin. Accordingly, *Yersinia enterocolitica* YadA, which binds fibronectin less efficiently than *Yersinia pseudotuberculosis* YadA, fails to promote bacterial entry into HepG2 cells (Heise and Dersch, 2006). A similar uptake mechanism has also been described for *Staphylococcus aureus* (Dziewanowska et al., 1999; Fowler et al., 2000; Sinha et al., 2000; Sinha et al., 1999) and has been linked to the activation of Src- and FAK-dependent signalling pathways (Agerer et al., 2005; Agerer et al., 2003). It has also been proposed that the binding of another invasive bacterium, *Shigella flexneri*, to host cells uses  $\beta 1$  integrins (Watarai et al., 1996). It is now clear, however, that the signalling pathways that control the uptake of *Shigella* species are largely independent of  $\beta 1$  signalling (Nhieu et al., 2005). The exact role

of  $\beta 1$  integrins in the initial binding of *Shigella* species to host cells remains to be elucidated.

$\beta 1$  integrins are therefore targeted by several bacterial pathogens to allow their entry into host cells through a phagocytic zipper-like process. Remarkably, pathogen-induced uptake involves conventional integrin signalling. In other words, the signalling pathways that are induced by  $\beta 1$  integrins during cell adhesion also underlie adhesion-dependent phagocytic processes. Consequently, the study of adhesion-promoted phagocytosis should help to better understand  $\beta 1$  signalling and regulation. For example, the fact that an invasin mutant that is unable to dimerise  $\beta 1$  integrins fails to activate Rac1 clearly suggests that outside-in signalling from  $\beta 1$  is dependent on integrin clustering (Dersch and Isberg, 1999; Dersch and Isberg, 2000). Strikingly, no other type of integrin is targeted by bacteria as often as is  $\beta 1$ . The fact that  $\beta 1$  signalling is particularly prone to hijacking by invasive bacteria might be because bacteria easily find themselves coated with fibronectin within tissues; it might also be linked to the relative abundance of  $\beta 1$  on the cell surface.

#### Virus internalisation – a phagocytic-like process?

Integrins are also frequently targeted by viruses in the process of host-cell entry (Stewart and Nemerow, 2007). Whether viruses thereby specifically use the ability of integrins to signal a phagocytic-like process remains unclear, particularly because viruses are below the size of particle that is commonly admitted for actin-driven phagocytic events (0.5  $\mu\text{m}$  in diameter). Virus entry is more classically associated with membrane fusion, or with clathrin- or caveolae-dependent endocytosis (Smith and Helenius, 2004).

Nevertheless, specific virus families use a process that is reminiscent of phagocytosis to invade host cells. Herpes simplex virus type I (HSV-1) enters cells through a protrusive phagocytic-like mechanism that requires Rho GTPase activity (Clement et al., 2006). Similarly, invasion of Chinese hamster ovary (CHO) cells by equine herpes virus type 1 (EHV-1) is independent of clathrin and caveolin but dependent on Rock activity, which suggests a role for acto-myosin contraction in EHV-1 internalisation (Frampton, Jr et al., 2007). Whether integrins are involved in EHV-1 and HSV-1 entry remains unclear. However, envelope glycoprotein H (gH) of HSV-1 and of human cytomegalovirus (HCMV; another herpes virus) binds the  $\alpha V\beta 3$  integrin (Parry et al., 2005). Interestingly, the binding of HCMV gH to  $\alpha V\beta 3$  is RGD independent and virus entry therefore requires cooperation between integrins and the epidermal growth factor (EGF) receptor (Wang et al., 2005); this process is reminiscent of the multi-receptor situation discussed above for AC uptake. In addition, the glycoprotein B (gB) from HCMV displays a disintegrin-like domain (conserved in HSV-1 and EHV-1 gBs) that promotes  $\beta 1$ -dependent HCMV internalisation. Notably, soluble gB from HCMV is sufficient to trigger cytoskeletal rearrangements, and stress-fibre and filopodia formation in a  $\beta 1$ -dependent manner (Feire et al., 2004). By contrast, gB from Kaposi's sarcoma-associated herpes virus (KSHV/HHV-8) contains an RGD motif, which, together with FAK activity, is required for virus entry, strongly suggesting an integrin-mediated entry process (Akula et al., 2002; Krishnan et al., 2006). Although KSHV gB was initially thought to interact with  $\alpha 3\beta 1$ , it appears more likely that it binds  $\alpha V\beta 3$  (Akula et al., 2002; Garrigues et al., 2008).

Several adenoviruses might also fall into the group of phagocytosed viruses. Human adenoviruses types 2 and 5 (Ad2 and Ad5) use a specific membrane receptor for cell attachment

(Bergelson et al., 1997; Tomko et al., 1997); however, their uptake is subsequently facilitated by the interaction with  $\alpha V\beta 3$  and  $\alpha V\beta 5$  integrins of five RGD motifs in a capsid viral protein (Mathias et al., 1994; Wickham et al., 1994; Wickham et al., 1993). Interestingly, the entry of Ad2 relies on actin-cytoskeleton remodelling and on the activity of Rac1 and Cdc42, which is reminiscent of type I phagocytosis (Li et al., 1998; Patterson and Russell, 1983). Similarly, the uptake of adenovirus type 3 (Ad3) was recently shown to be dependent on the  $\alpha V$  integrin and on Rac1- and Pak-1-dependent actin remodelling (Amstutz et al., 2008). Finally,  $\alpha 2\beta 1$ ,  $\alpha X\beta 2$ ,  $\alpha 4\beta 1$  and  $\alpha 4\beta 7$  integrins promote the entry of rotaviruses (Coulson et al., 1997; Graham et al., 2005; Graham et al., 2003; Graham et al., 2006; Guerrero et al., 2000; Hewish et al., 2000), although it remains to be seen whether this follows a phagocytic-like process.

Overall, several viral and bacterial pathogens use integrin signalling to enter host cells in an actin-dependent process. Deciphering the molecular pathways that are used for local, transient, integrin-triggered actin and membrane remodelling should aid in the design of drugs that will help fight infection *in vitro* and *in vivo*.

#### Conclusions and perspectives

In addition to their well-known role in mediating adhesion and motility, integrins clearly mediate a wide range of phagocytic processes of physio-pathological relevance. These range from the uptake of big particles such as ACs to the capture of smaller prey, such as bacteria and collagen fibrils. The high phagocytic ability of  $\alpha M\beta 2$ , the main receptor for opsonic complement fragments in professional phagocytes, has been recognised for over 20 years. As we have shown, it is now becoming clear that other integrin heterodimers can perform phagocytosis, including in non-immune cells. Phagocytosis is therefore not a property of specialised integrins or even of specific cells, but rather the natural ability of numerous integrin-family members. This is true of several  $\beta 1$ -,  $\beta 3$ - and  $\beta 5$ -based integrins, including integrins that usually mediate binding to ECM components such as vitronectin (binds  $\alpha V\beta 3$  and  $\alpha V\beta 5$ ), fibronectin (binds  $\alpha 5\beta 1$ ) or collagen (binds  $\alpha 2\beta 1$ ). This strongly suggests that the ability of integrins to mediate phagocytosis is an extension of their capacity to mediate adhesion. The reason why all integrins have not been linked to phagocytosis is unclear. Because phagocytosis is an actin-driven process, it is possible that  $\beta 6$ -,  $\beta 7$ - and  $\beta 8$ -based integrins, which are known to induce actin remodelling, might also support the phagocytic uptake of suitable ligands. By contrast,  $\beta 4$  integrins, which are linked to the intermediate filament but not the actin network, seem unlikely to display phagocytic potential (Hynes, 2002).

The idea that integrin-mediated phagocytosis relies on integrin signalling is particularly strengthened by the example of integrin-dependent bacterial invasion, in which the interaction of a microorganism with  $\alpha 5\beta 1$ , either directly or through a fibronectin bridge, is sufficient for phagocytic internalisation. This also shows that integrin-dependent phagocytosis and adhesion rely on the same regulatory and signalling mechanisms. This is why spreading on a ligand-coated surface has been compared to the frustrated phagocytosis of an infinitely large object (Cannon and Swanson, 1992). Indeed, whereas cells commonly spread onto a collagen-coated surface, collagen fibrils, once degraded, are readily phagocytosed by fibroblasts (Everts et al., 1996; Knowles et al., 1991; Lee et al., 1996); the same is true for fibronectin-coated surfaces versus fibronectin-coated particles (Tsai et al., 1999; Zhao



et al., 1999). A clear difference between the two processes is, however, that phagocytosis requires a transient, sequential and three-dimensional interaction of integrins with their ligand.

Investigating integrin-dependent phagocytosis has shown that integrins cannot work in isolation and always require the activity of co-receptors to be fully efficient.  $\alpha$ M $\beta$ 2-dependent phagocytosis in macrophages is dependent on additional signals to activate integrin-binding abilities via the small G protein Rap1. Interestingly, lipopolysaccharide that is present on the cell surface of most bacteria is a potent activator of Rap1, providing a clear example of cooperation between a pathogen-recognition receptor and an integrin receptor to mediate particle recognition and uptake. Similarly,  $\alpha$ V $\beta$ 3- and  $\alpha$ V $\beta$ 5-dependent phagocytosis of ACs illustrate how integrin signalling cooperates with co-receptors to trigger a full outside-in signalling pathway. Elucidation of the exact role of all receptors that contribute to integrin-dependent phagocytosis is needed in most cases to disentangle the different signalling pathways (inside-out versus outside-in) that are involved.

In the context of integrin-dependent uptake, signalling to the actin cytoskeleton involves either RhoA (for  $\alpha$ M $\beta$ 2-mediated phagocytosis of C3bi-opsonised particles) or Rac1 (and sometimes also Cdc42) activity. This dichotomy reflects the current understanding of phagocytosis in general and confirms both that particle engulfment can follow different actin-based mechanisms and that the mechanisms of integrin-dependent internalisation are similar to the general modes of phagocytosis. Interestingly, outside-in signalling relies exclusively on the  $\beta$ -chain of phagocytic integrins – at least this is true of  $\beta$ 2, which activates RhoA, and of  $\beta$ 1, which controls Rac activation (Gustavsson et al., 2002; Gustavsson et al., 2004; Wiedemann et al., 2006). Defining the precise mechanisms of preferential Rho-protein usage downstream of integrin ligation is a fascinating challenge.

Whereas the general role of integrins in phagocytosis is only emerging, integrins are clearly essential mediators of cell adhesion and migration. Understanding the molecular basis of their function in these complex processes is particularly challenging because several layers of regulation (e.g. surface expression, affinity, avidity and recycling) and multiple signalling pathways (e.g. inside-out and outside-in) are intertwined. In this regard, the model system of integrin-dependent phagocytosis offers a range of advantages when studying integrin regulation and function. First, the apparent conservation of pathways that regulate integrin activation and signalling makes it a suitable alternative system. Second, the easy distinction between bound and phagocytosed particles constitutes a straightforward and reliable way to assess integrin activation and signalling. Third, phagocytosis involves three-dimensional remodelling at the cell surface, as does adhesion and motility in vivo. Fourth, the adhesive stimulus (i.e. the phagocytic bait) can be controlled in terms of size, shape and ligand(s) density. Finally, phagocytosis is spatially and temporally well defined. This contrasts with migrating cells, in which signalling to and from integrins is not homogenous in the entire cell (Ridley et al., 2003). We therefore believe that integrin-dependent phagocytosis provides an exciting study system in which to better understand integrin function and regulation.

A.G.D. is supported by a post-doctoral fellowship from the Fondation pour la Recherche Médicale. Research in the Caron laboratory is supported by grants from the Biotechnology and Biological Sciences Research Council, the Wellcome Trust and the Medical Research Council.

## References

- Aderem, A. and Underhill, D. M. (1999). Mechanisms of phagocytosis in macrophages. *Annu. Rev. Immunol.* **17**, 593-623.
- Agerer, F., Michel, A., Ohlsen, K. and Hauck, C. R. (2003). Integrin-mediated invasion of *Staphylococcus aureus* into human cells requires Src family protein-tyrosine kinases. *J. Biol. Chem.* **278**, 42524-42531.
- Agerer, F., Lux, S., Michel, A., Rohde, M., Ohlsen, K. and Hauck, C. R. (2005). Cellular invasion by *Staphylococcus aureus* reveals a functional link between focal adhesion kinase and cactin in integrin-mediated internalisation. *J. Cell Sci.* **118**, 2189-2200.
- Aghazadeh, B., Lowry, W. E., Huang, X. Y. and Rosen, M. K. (2000). Structural basis for relief of autoinhibition of the Dbl homology domain of proto-oncogene Vav by tyrosine phosphorylation. *Cell* **102**, 625-633.
- Akakura, S., Singh, S., Spataro, M., Akakura, R., Kim, J. I., Albert, M. L. and Birge, R. B. (2004). The opsonin MFG-E8 is a ligand for the alphavbeta5 integrin and triggers DOCK180-dependent Rac1 activation for the phagocytosis of apoptotic cells. *Exp. Cell Res.* **292**, 403-416.
- Akula, S. M., Pramod, N. P., Wang, F. Z. and Chandran, B. (2002). Integrin alpha3beta1 (CD 49c/29) is a cellular receptor for Kaposi's sarcoma-associated herpesvirus (KSHV/HHV-8) entry into the target cells. *Cell* **108**, 407-419.
- Albert, M. L., Pearce, S. F., Francisco, L. M., Sauter, B., Roy, P., Silverstein, R. L. and Bhardwaj, N. (1998). Immature dendritic cells phagocytose apoptotic cells via alphavbeta5 and CD36, and cross-present antigens to cytotoxic T lymphocytes. *J. Exp. Med.* **188**, 1359-1368.
- Albert, M. L., Kim, J. I. and Birge, R. B. (2000). alphavbeta5 integrin recruits the CrkII-Dock180-rac1 complex for phagocytosis of apoptotic cells. *Nat. Cell Biol.* **2**, 899-905.
- Allen, L. A. and Aderem, A. (1996). Molecular definition of distinct cytoskeletal structures involved in complement- and Fc receptor-mediated phagocytosis in macrophages. *J. Exp. Med.* **184**, 627-637.
- Alrutz, M. A., Srivastava, A., Wong, K. W., D'Souza-Schorey, C., Tang, M., Ch'Ng, L. E., Snapper, S. B. and Isberg, R. R. (2001). Efficient uptake of *Yersinia pseudotuberculosis* via integrin receptors involves a Rac1-Arp 2/3 pathway that bypasses N-WASP function. *Mol. Microbiol.* **42**, 689-703.
- Amstutz, B., Gastaldelli, M., Kalin, S., Imelli, N., Boucke, K., Wandeler, E., Mercer, J., Hemmi, S. and Greber, U. F. (2008). Subversion of CtBP1-controlled macropinocytosis by human adenovirus serotype 3. *EMBO J.* **27**, 956-969.
- Arora, P. D., Manolson, M. F., Downey, G. P., Sodek, J. and McCulloch, C. A. (2000). A novel model system for characterization of phagosomal maturation, acidification, and intracellular collagen degradation in fibroblasts. *J. Biol. Chem.* **275**, 35432-35441.
- Arora, P. D., Glogauer, M., Kapus, A., Kwiatkowski, D. J. and McCulloch, C. A. (2004). Gelsolin mediates collagen phagocytosis through a rac-dependent step. *Mol. Biol. Cell* **15**, 588-599.
- Bamberger, M. E., Harris, M. E., McDonald, D. R., Husemann, J. and Landreth, G. E. (2003). A cell surface receptor complex for fibrillar beta-amyloid mediates microglial activation. *J. Neurosci.* **23**, 2665-2674.
- Barreiro, O., de la Fuente, H., Mittelbrunn, M. and Sanchez-Madrid, F. (2007). Functional insights on the polarized redistribution of leukocyte integrins and their ligands during leukocyte migration and immune interactions. *Immunol. Rev.* **218**, 147-164.
- Baum, P. D. and Garriga, G. (1997). Neuronal migrations and axon fasciculation are disrupted in in-1 integrin mutants. *Neuron* **19**, 51-62.
- Beller, D. I., Springer, T. A. and Schreiber, R. D. (1982). Anti-Mac-1 selectively inhibits the mouse and human type three complement receptor. *J. Exp. Med.* **156**, 1000-1009.
- Bergelson, J. M., Cunningham, J. A., Droguett, G., Kurt-Jones, E. A., Krithivas, A., Hong, J. S., Horwitz, M. S., Crowell, R. L. and Finberg, R. W. (1997). Isolation of a common receptor for Coxsackie B viruses and adenoviruses 2 and 5. *Science* **275**, 1320-1323.
- Bertoni, A., Tadokoro, S., Eto, K., Pampori, N., Parise, L. V., White, G. C. and Shattil, S. J. (2002). Relationships between Rap1b, affinity modulation of integrin alpha IIb beta 3, and the actin cytoskeleton. *J. Biol. Chem.* **277**, 25715-25721.
- Birkedal-Hansen, H., Moore, W. G., Bodden, M. K., Windsor, L. J., Birkedal-Hansen, B., DeCarlo, A. and Engler, J. A. (1993). Matrix metalloproteinases: a review. *Crit. Rev. Oral Biol. Med.* **4**, 197-250.
- Brugnera, E., Haney, L., Grimsley, C., Lu, M., Walk, S. F., Tosello-Tramont, A. C., Macara, I. G., Madhani, H., Fink, G. R. and Ravichandran, K. S. (2002). Unconventional Rac-GEF activity is mediated through the Dock180-ELMO complex. *Nat. Cell Biol.* **4**, 574-582.
- Bunting, M., Harris, E. S., McIntyre, T. M., Prescott, S. M. and Zimmerman, G. A. (2002). Leukocyte adhesion deficiency syndromes: adhesion and tethering defects involving beta 2 integrins and selectin ligands. *Curr. Opin. Hematol.* **9**, 30-35.
- Cannon, G. J. and Swanson, J. A. (1992). The macrophage capacity for phagocytosis. *J. Cell Sci.* **101**, 907-913.
- Carman, C. V. and Springer, T. A. (2003). Integrin avidity regulation: are changes in affinity and conformation underemphasized? *Curr. Opin. Cell Biol.* **15**, 547-556.
- Caron, E. and Hall, A. (1998). Identification of two distinct mechanisms of phagocytosis controlled by different Rho GTPases. *Science* **282**, 1717-1721.
- Caron, E., Self, A. J. and Hall, A. (2000). The GTPase Rap1 controls functional activation of macrophage integrin alphaMbeta2 by LPS and other inflammatory mediators. *Curr. Biol.* **10**, 974-978.
- Caswell, P. T. and Norman, J. C. (2006). Integrin trafficking and the control of cell migration. *Traffic* **7**, 14-21.
- Chang, Y. and Finnemann, S. C. (2007). Tetraspanin CD81 is required for the alpha v beta5-integrin-dependent particle-binding step of RPE phagocytosis. *J. Cell Sci.* **120**, 3053-3063.



- Clement, C., Tiwari, V., Scanlan, P. M., Valyi-Nagy, T., Yue, B. Y. and Shukla, D. (2006). A novel role for phagocytosis-like uptake in herpes simplex virus entry. *J. Cell Biol.* **174**, 1009-1021.
- Cohen, P. L., Caricchio, R., Abraham, V., Camenisch, T. D., Jennette, J. C., Roubey, R. A., Earp, H. S., Matsushima, G. and Reap, E. A. (2002). Delayed apoptotic cell clearance and lupus-like autoimmunity in mice lacking the c-mer membrane tyrosine kinase. *J. Exp. Med.* **196**, 135-140.
- Colucci-Guyon, E., Niedergang, F., Wallar, B. J., Peng, J., Alberts, A. S. and Chavrier, P. (2005). A role for mammalian diaphanous-related formins in complement receptor (CR3)-mediated phagocytosis in macrophages. *Curr. Biol.* **15**, 2007-2012.
- Conner, S. D. and Schmid, S. L. (2003). Regulated portals of entry into the cell. *Nature* **422**, 37-44.
- Coulson, B. S., Londrigan, S. L. and Lee, D. J. (1997). Rotavirus contains integrin ligand sequences and a disintegrin-like domain that are implicated in virus entry into cells. *Proc. Natl. Acad. Sci. USA* **94**, 5389-5394.
- Cox, E. A. and Hardin, J. (2004). Sticky worms: adhesion complexes in *C. elegans*. *J. Cell Sci.* **117**, 1885-1897.
- Czuchra, A., Meyer, H., Legate, K. R., Brakebusch, C. and Fassler, R. (2006). Genetic analysis of beta1 integrin "activation motifs" in mice. *J. Cell Biol.* **174**, 889-899.
- deBakker, C. D., Haney, L. B., Kinchen, J. M., Grimsley, C., Lu, M., Klingele, D., Hsu, P. K., Chou, B. K., Cheng, L. C., Blangy, A. et al. (2004). Phagocytosis of apoptotic cells is regulated by a UNC-73/TRIO-MIG-2/RhoG signaling module and armadillo repeats of CED-12/ELMO. *Curr. Biol.* **14**, 2208-2216.
- de Bruyn, K. M., Rangarajan, S., Reedquist, K. A., Figdor, C. G. and Bos, J. L. (2002). The small GTPase Rap1 is required for Mn(2+) and antibody-induced LFA-1- and VLA-4-mediated cell adhesion. *J. Biol. Chem.* **277**, 29468-29476.
- de Bruyn, K. M., Zwartkruis, F. J., de Rooij, J., Akkerman, J. W. and Bos, J. L. (2003). The small GTPase Rap1 is activated by turbulence and is involved in integrin [alpha]IIb[beta]3-mediated cell adhesion in human megakaryocytes. *J. Biol. Chem.* **278**, 22412-22417.
- DeMali, K. A. and Burridge, K. (2003). Coupling membrane protrusion and cell adhesion. *J. Cell Sci.* **116**, 2389-2397.
- Dersch, P. and Isberg, R. R. (1999). A region of the *Yersinia pseudotuberculosis* invasion protein enhances integrin-mediated uptake into mammalian cells and promotes self-association. *EMBO J.* **18**, 1199-1213.
- Dersch, P. and Isberg, R. R. (2000). An immunoglobulin superfamily-like domain unique to the *Yersinia pseudotuberculosis* invasion protein is required for stimulation of bacterial uptake via integrin receptors. *Infect. Immun.* **68**, 2930-2938.
- Devitt, A., Moffatt, O. D., Raykundalia, C., Capra, J. D., Simmons, D. L. and Gregory, C. D. (1998). Human CD14 mediates recognition and phagocytosis of apoptotic cells. *Nature* **392**, 505-509.
- Dziewanowska, K., Patti, J. M., Deobald, C. F., Bayles, K. W., Trumble, W. R. and Bohach, G. A. (1999). Fibronectin binding protein and host cell tyrosine kinase are required for internalization of *Staphylococcus aureus* by epithelial cells. *Infect. Immun.* **67**, 4673-4678.
- Ellis, R. E., Jacobson, D. M. and Horvitz, H. R. (1991). Genes required for the engulfment of cell corpses during programmed cell death in *Caenorhabditis elegans*. *Genetics* **129**, 79-94.
- Enserink, J. M., Price, L. S., Methi, T., Mahic, M., Sonnenberg, A., Bos, J. L. and Tasken, K. (2004). The cAMP-Epac-Rap1 pathway regulates cell spreading and cell adhesion to laminin-5 through the alpha3beta1 integrin but not the alpha6beta4 integrin. *J. Biol. Chem.* **279**, 44889-44896.
- Everts, V., van der Zee, E., Creemers, L. and Beertsen, W. (1996). Phagocytosis and intracellular digestion of collagen, its role in turnover and remodelling. *Histochem. J.* **28**, 229-245.
- Fadok, V. A., Warner, M. L., Bratton, D. L. and Henson, P. M. (1998). CD36 is required for phagocytosis of apoptotic cells by human macrophages that use either a phosphatidylserine receptor or the vitronectin receptor (alpha v beta 3). *J. Immunol.* **161**, 6250-6257.
- Feire, A. L., Koss, H. and Compton, T. (2004). Cellular integrins function as entry receptors for human cytomegalovirus via a highly conserved disintegrin-like domain. *Proc. Natl. Acad. Sci. USA* **101**, 15470-15475.
- Finnemann, S. C., Bonilha, V. L., Marmorstein, A. D. and Rodriguez-Boulan, E. (1997). Phagocytosis of rod outer segments by retinal pigment epithelial cells requires alpha(v)beta5 integrin for binding but not for internalization. *Proc. Natl. Acad. Sci. USA* **94**, 12932-12937.
- Foukas, L. C., Katsoulas, H. L., Paraskevopoulou, N., Metheniti, A., Lambropoulou, M. and Marmaras, V. J. (1998). Phagocytosis of *Escherichia coli* by insect hemocytes requires both activation of the Ras/mitogen-activated protein kinase signal transduction pathway for attachment and beta3 integrin for internalization. *J. Biol. Chem.* **273**, 14813-14818.
- Fowler, T., Wann, E. R., Joh, D., Johanson, S., Foster, T. J. and Hook, M. (2000). Cellular invasion by *Staphylococcus aureus* involves a fibronectin bridge between the bacterial fibronectin-binding MSCRAMMs and host cell beta1 integrins. *Eur. J. Cell Biol.* **79**, 672-679.
- Frampton, A. R., Jr, Stolz, D. B., Uchida, H., Goins, W. F., Cohen, J. B. and Glorioso, J. C. (2007). Equine herpesvirus 1 enters cells by two different pathways, and infection requires the activation of the cellular kinase ROCK1. *J. Virol.* **81**, 10879-10889.
- Gaggioli, C., Hooper, S., Hidalgo-Carcedo, C., Grosse, R., Marshall, J. F., Harrington, K. and Sahai, E. (2007). Fibroblast-led collective invasion of carcinoma cells with differing roles for RhoGTPases in leading and following cells. *Nat. Cell Biol.* **9**, 1392-1400.
- Garrigues, H. J., Rubinchikova, Y. E., Dipersio, C. M. and Rose, T. M. (2008). Integrin alphaVbeta3 Binds to the RGD motif of glycoprotein B of Kaposi's sarcoma-associated herpesvirus and functions as an RGD-dependent entry receptor. *J. Virol.* **82**, 1570-1580.
- Geiger, B., Bershadsky, A., Pankov, R. and Yamada, K. M. (2001). Transmembrane crosstalk between the extracellular matrix-cytoskeleton crosstalk. *Nat. Rev. Mol. Cell Biol.* **2**, 793-805.
- Graham, K. L., Halasz, P., Tan, Y., Hewish, M. J., Takada, Y., Mackow, E. R., Robinson, M. K. and Coulson, B. S. (2003). Integrin-using rotaviruses bind alpha2beta1 integrin alpha2 I domain via VP4 DGE sequence and recognize alphaXbeta2 and alphaVbeta3 by using VP7 during cell entry. *J. Virol.* **77**, 9969-9978.
- Graham, K. L., Fleming, F. E., Halasz, P., Hewish, M. J., Nagesha, H. S., Holmes, I. H., Takada, Y. and Coulson, B. S. (2005). Rotaviruses interact with alpha4beta7 and alpha4beta1 integrins by binding the same integrin domains as natural ligands. *J. Gen. Virol.* **86**, 3397-3408.
- Graham, K. L., Takada, Y. and Coulson, B. S. (2006). Rotavirus spike protein VP5\* binds alpha2beta1 integrin on the cell surface and competes with virus for cell binding and infectivity. *J. Gen. Virol.* **87**, 1275-1283.
- Greenberg, M. E., Sun, M., Zhang, R., Febbraio, M., Silverstein, R. and Hazen, S. L. (2006). Oxidized phosphatidylserine-CD36 interactions play an essential role in macrophage-dependent phagocytosis of apoptotic cells. *J. Exp. Med.* **203**, 2613-2625.
- Greenberg, S. and Grinstein, S. (2002). Phagocytosis and innate immunity. *Curr. Opin. Immunol.* **14**, 136-145.
- Griffin, F. M., Jr, Griffin, J. A., Leider, J. E. and Silverstein, S. C. (1975). Studies on the mechanism of phagocytosis. I. Requirements for circumferential attachment of particle-bound ligands to specific receptors on the macrophage plasma membrane. *J. Exp. Med.* **142**, 1263-1282.
- Guerrero, C. A., Mendez, E., Zarate, S., Isa, P., Lopez, S. and Arias, C. F. (2000). Integrin alpha(v)beta(3) mediates rotavirus cell entry. *Proc. Natl. Acad. Sci. USA* **97**, 14644-14649.
- Gumienny, T. L., Brugnera, E., Tosello-Trampont, A. C., Kinchen, J. M., Haney, L. B., Nishiwaki, K., Walk, S. F., Nemerget, M. E., Macara, I. G., Francis, R. et al. (2001). CED-12/ELMO, a novel member of the CrkII/Dock180/Rac pathway, is required for phagocytosis and cell migration. *Cell* **107**, 27-41.
- Gustavsson, A., Armulik, A., Brakebusch, C., Fassler, R., Johansson, S. and Fallman, M. (2002). Role of the beta1-integrin cytoplasmic tail in mediating invasion-promoted internalization of *Yersinia*. *J. Cell Sci.* **115**, 2669-2678.
- Gustavsson, A., Yuan, M. and Fallman, M. (2004). Temporal dissection of beta1-integrin signaling indicates a role for p130Cas-Crk in filopodia formation. *J. Biol. Chem.* **279**, 22893-22901.
- Hall, A. B., Gakidis, M. A., Glogauer, M., Wilsbacher, J. L., Gao, S., Swat, W. and Brugge, J. S. (2006). Requirements for Vav guanine nucleotide exchange factors and Rho GTPases in FgammaR- and complement-mediated phagocytosis. *Immunity* **24**, 305-316.
- Han, J., Lim, C. J., Watanabe, N., Soriani, A., Ratnikov, B., Calderwood, D. A., Puzon-McLaughlin, W., Lafuente, E. M., Boussiotis, V. A., Shattil, S. J. et al. (2006). Reconstructing and deconstructing agonist-induced activation of integrin alphaIIb beta3. *Curr. Biol.* **16**, 1796-1806.
- Hanayama, R., Tanaka, M., Miwa, K., Shinohara, A., Iwamatsu, A. and Nagata, S. (2002). Identification of a factor that links apoptotic cells to phagocytes. *Nature* **417**, 182-187.
- Hanayama, R., Tanaka, M., Miyasaka, K., Aozasa, K., Koike, M., Uchiyama, Y. and Nagata, S. (2004). Autoimmune disease and impaired uptake of apoptotic cells in MFG-E8-deficient mice. *Science* **304**, 1147-1150.
- Hauck, C. R., Agerer, F., Muenzner, P. and Schmitter, T. (2006). Cellular adhesion molecules as targets for bacterial infection. *Eur. J. Cell Biol.* **85**, 235-242.
- Hedgecock, E. M., Sulston, J. E. and Thomson, J. N. (1983). Mutations affecting programmed cell deaths in the nematode *Caenorhabditis elegans*. *Science* **220**, 1277-1279.
- Heise, T. and Dersch, P. (2006). Identification of a domain in *Yersinia* virulence factor YadA that is crucial for extracellular matrix-specific cell adhesion and uptake. *Proc. Natl. Acad. Sci. USA* **103**, 3375-3380.
- Henson, P. M. (2005). Dampening inflammation. *Nat. Immunol.* **6**, 1179-1181.
- Hewish, M. J., Takada, Y. and Coulson, B. S. (2000). Integrins alpha2beta1 and alpha4beta1 can mediate SA11 rotavirus attachment and entry into cells. *J. Virol.* **74**, 228-236.
- Hirsch, E., Barberis, L., Brancaccio, M., Azzolino, O., Xu, D., Kyriakis, J. M., Silengo, L., Giancotti, F. G., Tarone, G., Fassler, R. et al. (2002). Defective Rac-mediated proliferation and survival after targeted mutation of the beta1 integrin cytodomain. *J. Cell Biol.* **157**, 481-492.
- Hoffmann, P. R., deCathelineau, A. M., Ogden, C. A., Leverrier, Y., Bratton, D. L., Daleke, D. L., Ridley, A. J., Fadok, V. A. and Henson, P. M. (2001). Phosphatidylserine (PS) induces PS receptor-mediated macropinocytosis and promotes clearance of apoptotic cells. *J. Cell Biol.* **155**, 649-659.
- Hogg, N., Henderson, R., Leitinger, B., McDowall, A., Porter, J. and Stanley, P. (2002). Mechanisms contributing to the activity of integrins on leukocytes. *Immunol. Rev.* **186**, 164-171.
- Hynes, R. O. (2002). Integrins: bidirectional, allosteric signaling machines. *Cell* **110**, 673-687.
- Katagiri, K., Hattori, M., Minato, N. and Kinashi, T. (2002). Rap1 functions as a key regulator of T-cell and antigen-presenting cell interactions and modulates T-cell responses. *Mol. Cell Biol.* **22**, 1001-1015.
- Katagiri, K., Maeda, A., Shimonaka, M. and Kinashi, T. (2003). RAP1, a Rap1-binding molecule that mediates Rap1-induced adhesion through spatial regulation of LFA-1. *Nat. Immunol.* **4**, 741-748.

- Katagiri, K., Ohnishi, N., Kabashima, K., Iyoda, T., Takeda, N., Shinkai, Y., Inaba, K. and Kinashi, T. (2004). Crucial functions of the Rap1 effector molecule RAPL in lymphocyte and dendritic cell trafficking. *Nat. Immunol.* **5**, 1045-1051.
- Kerksiek, K. M., Niedergang, F., Chavrier, P., Busch, D. H. and Brocker, T. (2005). Selective Rac1 inhibition in dendritic cells diminishes apoptotic cell uptake and cross-presentation in vivo. *Blood* **105**, 742-749.
- Kinchen, J. M., Cabello, J., Klingele, D., Wong, K., Feichtinger, R., Schnabel, H., Schnabel, R. and Hengartner, M. O. (2005). Two pathways converge at CED-10 to mediate actin rearrangement and corpse removal in *C. elegans*. *Nature* **434**, 93-99.
- Knowles, G. C., McKeown, M., Sodek, J. and McCulloch, C. A. (1991). Mechanism of collagen phagocytosis by human gingival fibroblasts: importance of collagen structure in cell recognition and internalization. *J. Cell Sci.* **98**, 551-558.
- Koenigsnecht, J. and Landreth, G. (2004). Microglial phagocytosis of fibrillar beta-amyloid through a beta1 integrin-dependent mechanism. *J. Neurosci.* **24**, 9838-9846.
- Krishnan, H. H., Sharma-Walia, N., Streblov, D. N., Naranatt, P. P. and Chandran, B. (2006). Focal adhesion kinase is critical for entry of Kaposi's sarcoma-associated herpesvirus into target cells. *J. Virol.* **80**, 1167-1180.
- Lafuente, E. M., van Puijenbroek, A. A., Krause, M., Carman, C. V., Freeman, G. J., Berezovskaya, A., Constantine, E., Springer, T. A., Gertler, F. B. and Bousiotis, V. A. (2004). RIAM, an Ena/VASP and Profilin ligand, interacts with Rap1-GTP and mediates Rap1-induced adhesion. *Dev. Cell* **7**, 585-595.
- Lee, M., Cram, E. J., Shen, B. and Schwarzbauer, J. E. (2001). Roles for beta(pat-3) integrins in development and function of *Caenorhabditis elegans* muscles and gonads. *J. Biol. Chem.* **276**, 36404-36410.
- Lee, W., Sodek, J. and McCulloch, C. A. (1996). Role of integrins in regulation of collagen phagocytosis by human fibroblasts. *J. Cell. Physiol.* **168**, 695-704.
- Leverrier, Y. and Ridley, A. J. (2001). Requirement for Rho GTPases and PI 3-kinases during apoptotic cell phagocytosis by macrophages. *Curr. Biol.* **11**, 195-199.
- Li, E., Stupack, D., Bokoch, G. M. and Nemerow, G. R. (1998). Adenovirus endocytosis requires actin cytoskeleton reorganization mediated by Rho family GTPases. *J. Virol.* **72**, 8806-8812.
- Lim, J., Wiedemann, A., Tzircotis, G., Monkley, S. J., Critchley, D. R. and Caron, E. (2007). An essential role for talin during alpha(M)beta(2)-mediated phagocytosis. *Mol. Biol. Cell* **18**, 976-985.
- Lu, M., Kinchen, J. M., Rossman, K. L., Grimsley, C., deBakker, C., Brugnera, E., Tosello-Trampont, A. C., Haney, L. B., Klingele, D., Sondek, J. et al. (2004). PH domain of ELMO functions in trans to regulate Rac activation via Dock180. *Nat. Struct. Mol. Biol.* **11**, 756-762.
- Lucas, M., Stuart, L. M., Zhang, A., Hodivala-Dilke, K., Febbraio, M., Silverstein, R., Savill, J. and Lacy-Hulbert, A. (2006). Requirements for apoptotic cell contact in regulation of macrophage responses. *J. Immunol.* **177**, 4047-4054.
- Luo, B. H., Carman, C. V. and Springer, T. A. (2007). Structural basis of integrin regulation and signaling. *Annu. Rev. Immunol.* **25**, 619-647.
- Lutz, M. A. and Correll, P. H. (2003). Activation of CR3-mediated phagocytosis by MSP requires the RON receptor, tyrosine kinase activity, phosphatidylinositol 3-kinase, and protein kinase C zeta. *J. Leukoc. Biol.* **73**, 802-814.
- Maderna, P. and Godson, C. (2003). Phagocytosis of apoptotic cells and the resolution of inflammation. *Biochim. Biophys. Acta* **1639**, 141-151.
- Mathias, P., Wickham, T., Moore, M. and Nemerow, G. (1994). Multiple adenovirus serotypes use alpha v integrins for infection. *J. Virol.* **68**, 6811-6814.
- May, R. C., Caron, E., Hall, A. and Machesky, L. M. (2000). Involvement of the Arp2/3 complex in phagocytosis mediated by FcgammaR or CR3. *Nat. Cell Biol.* **2**, 246-248.
- McGee, K., Zettl, M., Way, M. and Fallman, M. (2001). A role for N-WASP in invasion-promoted internalisation. *FEBS Lett.* **509**, 59-65.
- McLeod, S. J., Shum, A. J., Lee, R. L., Takei, F. and Gold, M. R. (2004). The Rap GTPases regulate integrin-mediated adhesion, cell spreading, actin polymerization, and Pyk2 tyrosine phosphorylation in B lymphocytes. *J. Biol. Chem.* **279**, 12009-12019.
- Melcher, A. H. and Chan, J. (1981). Phagocytosis and digestion of collagen by gingival fibroblasts in vivo: a study of serial sections. *J. Ultrastruct. Res.* **77**, 1-36.
- Moita, L. F., Wang-Sattler, R., Michel, K., Zimmermann, T., Blandin, S., Levashina, E. A. and Kafatos, F. C. (2005). In vivo identification of novel regulators and conserved pathways of phagocytosis in *A. gambiae*. *Immunity* **23**, 65-73.
- Moita, L. F., Vriend, G., Mahairaki, V., Louis, C. and Kafatos, F. C. (2006). Integrins of *Anopheles gambiae* and a putative role of a new beta integrin, BINT2, in phagocytosis of *E. coli*. *Insect Biochem. Mol. Biol.* **36**, 282-290.
- Nagata, K., Ohashi, K., Nakano, T., Arita, H., Zog, C., Hanafusa, H. and Mizuno, K. (1996). Identification of the product of growth arrest-specific gene 6 as a common ligand for Axl, Sky, and Mer receptor tyrosine kinases. *J. Biol. Chem.* **271**, 30022-30027.
- Nakaya, M., Tanaka, M., Okabe, Y., Hanayama, R. and Nagata, S. (2006). Opposite effects of rho family GTPases on engulfment of apoptotic cells by macrophages. *J. Biol. Chem.* **281**, 8836-8842.
- Nandrot, E. F., Kim, Y., Brodie, S. E., Huang, X., Sheppard, D. and Finnemann, S. C. (2004). Loss of synchronized retinal phagocytosis and age-related blindness in mice lacking alphavbeta5 integrin. *J. Exp. Med.* **200**, 1539-1545.
- Nandrot, E. F., Anand, M., Almeida, D., Atabai, K., Sheppard, D. and Finnemann, S. C. (2007). Essential role for MFG-E8 as ligand for alphavbeta5 integrin in diurnal retinal phagocytosis. *Proc. Natl. Acad. Sci. USA* **104**, 12005-12010.
- Nemerow, G. R. and Cheresch, D. A. (2002). Herpesvirus hijacks an integrin. *Nat. Cell Biol.* **4**, E69-E71.
- Nhieu, G. T., Enninga, J., Sansonetti, P. and Grompone, G. (2005). Tyrosine kinase signaling and type III effectors orchestrating *Shigella* invasion. *Curr. Opin. Microbiol.* **8**, 16-20.
- Niedergang, F. and Chavrier, P. (2004). Signaling and membrane dynamics during phagocytosis: many roads lead to the phagos(R)ome. *Curr. Opin. Cell Biol.* **16**, 422-428.
- Niedergang, F. and Chavrier, P. (2005). Regulation of phagocytosis by Rho GTPases. *Curr. Top. Microbiol. Immunol.* **291**, 43-60.
- Ogden, C. A., deCathelineau, A., Hoffmann, P. R., Bratton, D., Ghebrehewet, B., Fadok, V. A. and Henson, P. M. (2001). C1q and mannose binding lectin engagement of cell surface calreticulin and CD91 initiates macropinocytosis and uptake of apoptotic cells. *J. Exp. Med.* **194**, 781-795.
- Olazabal, I. M., Caron, E., May, R. C., Schilling, K., Knecht, D. A. and Machesky, L. M. (2002). Rho-kinase and myosin-II control phagocytic cup formation during CR, but not FcgammaR, phagocytosis. *Curr. Biol.* **12**, 1413-1418.
- Pankov, R., Endo, Y., Even-Ram, S., Araki, M., Clark, K., Cukierman, E., Matsumoto, K. and Yamada, K. M. (2005). A Rac switch regulates random versus directionally persistent cell migration. *J. Cell Biol.* **170**, 793-802.
- Parsec, D. M., Ghosh, R. N. and Maxfield, F. R. (1996). Microglial cells internalize aggregates of the Alzheimer's disease amyloid beta-protein via a scavenger receptor. *Neuron* **17**, 553-565.
- Park, D., Tosello-Trampont, A. C., Elliott, M. R., Lu, M., Haney, L. B., Ma, Z., Klibanov, A. L., Mandell, J. W. and Ravichandran, K. S. (2007). BAI1 is an engulfment receptor for apoptotic cells upstream of the ELMO/Dock180/Rac module. *Nature* **450**, 430-434.
- Parry, C., Bell, S., Minson, T. and Browne, H. (2005). Herpes simplex virus type 1 glycoprotein H binds to alphavbeta3 integrins. *J. Gen. Virol.* **86**, 7-10.
- Patterson, S. and Russell, W. C. (1983). Ultrastructural and immunofluorescence studies of early events in adenovirus-HeLa cell interactions. *J. Gen. Virol.* **64**, 1091-1099.
- Ravichandran, K. S. and Lorenz, U. (2007). Engulfment of apoptotic cells: signals for a good meal. *Nat. Rev. Immunol.* **7**, 964-974.
- Reddien, P. W. and Horvitz, H. R. (2000). CED-2/CrkII and CED-10/Rac control phagocytosis and cell migration in *Caenorhabditis elegans*. *Nat. Cell Biol.* **2**, 131-136.
- Reedquist, K. A., Ross, E., Koop, E. A., Wolthuis, R. M., Zwartkruis, F. J., van Kooyk, Y., Salmon, M., Buckley, C. D. and Bos, J. L. (2000). The small GTPase, Rap1, mediates CD31-induced integrin adhesion. *J. Cell Biol.* **148**, 1151-1158.
- Reynolds, L. E., Wyder, L., Lively, J. C., Taverna, D., Robinson, S. D., Huang, X., Sheppard, D., Hynes, R. O. and Hodivala-Dilke, K. M. (2002). Enhanced pathological angiogenesis in mice lacking beta3 integrin or beta3 and beta5 integrins. *Nat. Med.* **8**, 27-34.
- Ridley, A. J., Schwartz, M. A., Burridge, K., Firtel, R. A., Ginsberg, M. H., Borisy, G., Parsons, J. T. and Horwitz, A. R. (2003). Cell migration: integrating signals from front to back. *Science* **302**, 1704-1709.
- Savill, J., Dransfield, I., Hogg, N. and Haslett, C. (1990). Vitronectin receptor-mediated phagocytosis of cells undergoing apoptosis. *Nature* **343**, 170-173.
- Scott, R. S., McMahon, E. J., Pop, S. M., Reap, E. A., Caricchio, R., Cohen, P. L., Earp, H. S. and Matsushima, G. K. (2001). Phagocytosis and clearance of apoptotic cells is mediated by MER. *Nature* **411**, 207-211.
- Sebzda, E., Bracke, M., Tugal, T., Hogg, N. and Cantrell, D. A. (2002). Rap1A positively regulates T cells via integrin activation rather than inhibiting lymphocyte signaling. *Nat. Immunol.* **3**, 251-258.
- Serrander, L., Skarman, P., Rasmussen, B., Witke, W., Lew, D. P., Krause, K. H., Stendahl, O. and Nusse, O. (2000). Selective inhibition of IgG-mediated phagocytosis in gelsolin-deficient murine neutrophils. *J. Immunol.* **165**, 2451-2457.
- Singh, S., D'Mello, V., van Bergen en Henegouwen, P. and Birge, R. B. (2007). A NPXY-independent beta5 integrin activation signal regulates phagocytosis of apoptotic cells. *Biochem. Biophys. Res. Commun.* **364**, 540-548.
- Sinha, B., Francois, P. P., Nusse, O., Foti, M., Hartford, O. M., Vaudaux, P., Foster, T. J., Lew, D. P., Herrmann, M. and Krause, K. H. (1999). Fibronectin-binding protein acts as Staphylococcus aureus invasin via fibronectin bridging to integrin alpha5beta1. *Cell. Microbiol.* **1**, 101-117.
- Sinha, B., Francois, P., Que, Y. A., Hussain, M., Heilmann, C., Moreillon, P., Lew, D., Krause, K. H., Peters, G. and Herrmann, M. (2000). Heterologously expressed Staphylococcus aureus fibronectin-binding proteins are sufficient for invasion of host cells. *Infect. Immun.* **68**, 6871-6878.
- Smith, A. E. and Helenius, A. (2004). How viruses enter animal cells. *Science* **304**, 237-242.
- Stewart, P. L. and Nemerow, G. R. (2007). Cell integrins: commonly used receptors for diverse viral pathogens. *Trends Microbiol.* **15**, 500-507.
- Suzuki-Inoue, K., Yatomi, Y., Asazuma, N., Kainoh, M., Tanaka, T., Satoh, K. and Ozaki, Y. (2001). Rac, a small guanosine triphosphate-binding protein, and p21-activated kinase are activated during platelet spreading on collagen-coated surfaces: roles of integrin alpha(2)beta(1). *Blood* **98**, 3708-3716.
- Tadokoro, S., Shattil, S. J., Eto, K., Tai, V., Liddington, R. C., de Pereda, J. M., Ginsberg, M. H. and Calderwood, D. A. (2003). Talin binding to integrin beta tails: a final common step in integrin activation. *Science* **302**, 103-106.
- Taverna, D., Moher, H., Crowley, D., Borsig, L., Varki, A. and Hynes, R. O. (2004). Increased primary tumor growth in mice null for beta3- or beta3/beta5-integrins or selectins. *Proc. Natl. Acad. Sci. USA* **101**, 763-768.
- ten Cate, A. R. (1972). Morphological studies of fibrocytes in connective tissue undergoing rapid remodelling. *J. Anat.* **112**, 401-414.
- Tomko, R. P., Xu, R. and Philipson, L. (1997). HCAR and MCAR: the human and mouse cellular receptors for subgroup C adenoviruses and group B coxsackieviruses. *Proc. Natl. Acad. Sci. USA* **94**, 3352-3356.
- Tosello-Trampont, A. C., Nakada-Tsukui, K. and Ravichandran, K. S. (2003). Engulfment of apoptotic cells is negatively regulated by Rho-mediated signaling. *J. Biol. Chem.* **278**, 49911-49919.
- Tosello-Trampont, A. C., Kinchen, J. M., Brugnera, E., Haney, L. B., Hengartner, M. O. and Ravichandran, K. S. (2007). Identification of two signaling submodules within

- the CrkII/ELMO/Dock180 pathway regulating engulfment of apoptotic cells. *Cell Death Differ.* **14**, 963-972.
- Tran Van Nhie, G. and Isberg, R. R.** (1993). Bacterial internalization mediated by beta 1 chain integrins is determined by ligand affinity and receptor density. *EMBO J.* **12**, 1887-1895.
- Tsai, C. C., Ma, R. H. and Shieh, T. Y.** (1999). Deficiency in collagen and fibronectin phagocytosis by human buccal mucosa fibroblasts in vitro as a possible mechanism for oral submucous fibrosis. *J. Oral Pathol. Med.* **28**, 59-63.
- Underhill, D. M. and Ozinsky, A.** (2002). Phagocytosis of microbes: complexity in action. *Annu. Rev. Immunol.* **20**, 825-852.
- Vachon, E., Martin, R., Kwok, V., Cherepanov, V., Chow, C. W., Doerschuk, C. M., Plumb, J., Grinstein, S. and Downey, G. P.** (2007). CD44-mediated phagocytosis induces inside-out activation of complement receptor-3 in murine macrophages. *Blood* **110**, 4492-4502.
- Wang, X., Huang, D. Y., Huong, S. M. and Huang, E. S.** (2005). Integrin alphavbeta3 is a coreceptor for human cytomegalovirus. *Nat. Med.* **11**, 515-521.
- Watarai, M., Funato, S. and Sasakawa, C.** (1996). Interaction of Ipa proteins of *Shigella flexneri* with alpha5beta1 integrin promotes entry of the bacteria into mammalian cells. *J. Exp. Med.* **183**, 991-999.
- Wickham, T. J., Mathias, P., Cheresch, D. A. and Nemerow, G. R.** (1993). Integrins alpha v beta 3 and alpha v beta 5 promote adenovirus internalization but not virus attachment. *Cell* **73**, 309-319.
- Wickham, T. J., Filardo, E. J., Cheresch, D. A. and Nemerow, G. R.** (1994). Integrin alpha v beta 5 selectively promotes adenovirus mediated cell membrane permeabilization. *J. Cell Biol.* **127**, 257-264.
- Wiedemann, A., Patel, J. C., Lim, J., Tsun, A., van Kooyk, Y. and Caron, E.** (2006). Two distinct cytoplasmic regions of the beta2 integrin chain regulate RhoA function during phagocytosis. *J. Cell Biol.* **172**, 1069-1079.
- Wilkinson, B., Koenigsnecht-Talboo, J., Grommes, C., Lee, C. Y. and Landreth, G.** (2006). Fibrillar beta-amyloid-stimulated intracellular signaling cascades require Vav for induction of respiratory burst and phagocytosis in monocytes and microglia. *J. Biol. Chem.* **281**, 20842-20850.
- Williams, B. D. and Waterston, R. H.** (1994). Genes critical for muscle development and function in *Caenorhabditis elegans* identified through lethal mutations. *J. Cell Biol.* **124**, 475-490.
- Wong, K. W. and Isberg, R. R.** (2005). Emerging views on integrin signaling via Rac1 during invasion-promoted bacterial uptake. *Curr. Opin. Microbiol.* **8**, 4-9.
- Wright, S. D. and Meyer, B. C.** (1986). Phorbol esters cause sequential activation and deactivation of complement receptors on polymorphonuclear leukocytes. *J. Immunol.* **136**, 1759-1764.
- Wu, Y. C., Tsai, M. C., Cheng, L. C., Chou, C. J. and Weng, N. Y.** (2001). *C. elegans* CED-12 acts in the conserved crkII/DOCK180/Rac pathway to control cell migration and cell corpse engulfment. *Dev. Cell* **1**, 491-502.
- Wu, Y., Singh, S., Georgescu, M. M. and Birge, R. B.** (2005). A role for Mer tyrosine kinase in alphavbeta5 integrin-mediated phagocytosis of apoptotic cells. *J. Cell Sci.* **118**, 539-553.
- Zaidel-Bar, R., Itzkovitz, S., Ma'ayan, A., Iyengar, R. and Geiger, B.** (2007). Functional atlas of the integrin adhesome. *Nat. Cell Biol.* **9**, 858-867.
- Zamir, E. and Geiger, B.** (2001). Molecular complexity and dynamics of cell-matrix adhesions. *J. Cell Sci.* **114**, 3583-3590.
- Zhao, M. W., Jin, M. L., He, S., Spee, C., Ryan, S. J. and Hinton, D. R.** (1999). A distinct integrin-mediated phagocytic pathway for extracellular matrix remodeling by RPE cells. *Invest. Ophthalmol. Vis. Sci.* **40**, 2713-2723.
- Zhou, Z., Caron, E., Hartwig, E., Hall, A. and Horvitz, H. R.** (2001a). The *C. elegans* PH domain protein CED-12 regulates cytoskeletal reorganization via a Rho/Rac GTPase signaling pathway. *Dev. Cell* **1**, 477-489.
- Zhou, Z., Hartwig, E. and Horvitz, H. R.** (2001b). CED-1 is a transmembrane receptor that mediates cell corpse engulfment in *C. elegans*. *Cell* **104**, 43-56.
- Zullig, S. and Hengartner, M. O.** (2004). Cell biology. Tickling macrophages, a serious business. *Science* **304**, 1123-1124.
